# Supplementary material for: Soluble OX40L is associated with presence of autoantibodies in early rheumatoid arthritis
Source: PubMed Central journal article supplement (PMC4230735; doi:10.1186/s13075-014-0474-4), 2014-10-30

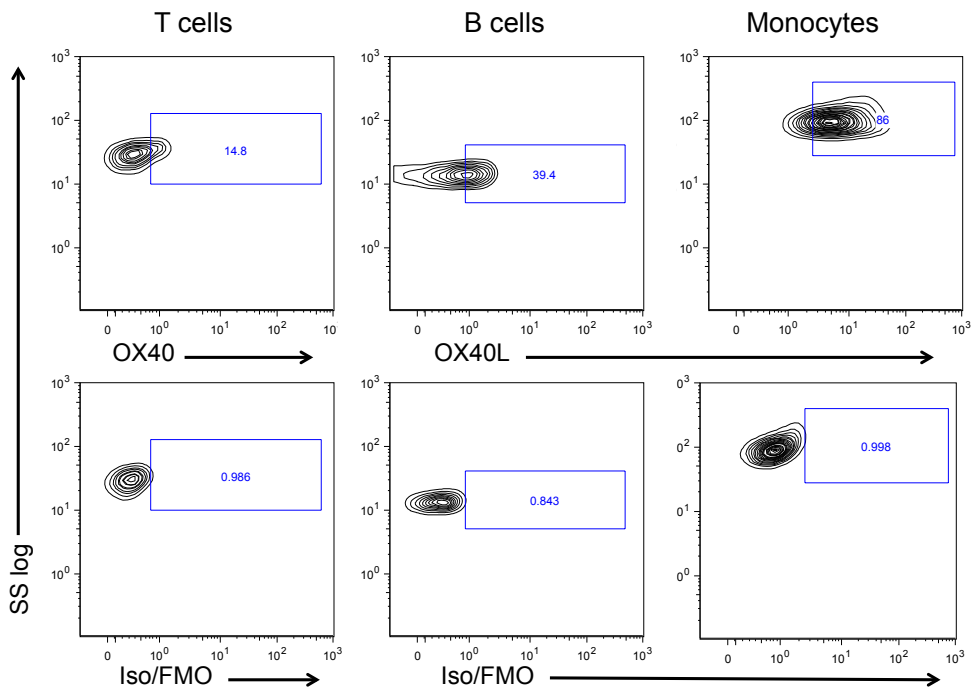

Supplement: 13075_2014_474_MOESM1_ESM.pdf [file 13075_2014_474_MOESM1_ESM.pdf]
